# Supplementary material
Source: Royal Society of Chemistry journal article supplement (doi:10.1039/d6cp01681b)
Supplement: d6cp01681b1.pdf [file d6cp01681b1.pdf]

## *Supplementary Information*

### **Strain-Induced Magnetic Transition and Exchange Competition in a Metallic**

#### **Cr<sub>2</sub>SbS Monolayer with High Néel Temperature**

| <b>Index</b>                                                                                   | <b>Page</b> |
|------------------------------------------------------------------------------------------------|-------------|
| 1. Electron localization function and spin-polarized charge density                            | 2           |
| 2. Six magnetic configurations of the Cr <sub>2</sub> SbS monolayer                            | 2           |
| 3. Electronic band structure with SOC included and PDOS of the Cr <sub>2</sub> SbS monolayer   | 3           |
| 4. MAE and T <sub>N</sub> of the Cr <sub>2</sub> SbS monolayer under biaxial strain            | 3           |
| 5. Band structures of the Cr <sub>2</sub> SbS monolayer under -4%~4% biaxial strain            | 4           |
| 6. PDOS of the Cr <sub>2</sub> SbS monolayer under -4%~4% biaxial strain                       | 4           |
| 7. M <sub>Z</sub> and C <sub>V</sub> of the Cr <sub>2</sub> SbS monolayer under biaxial strain | 5           |

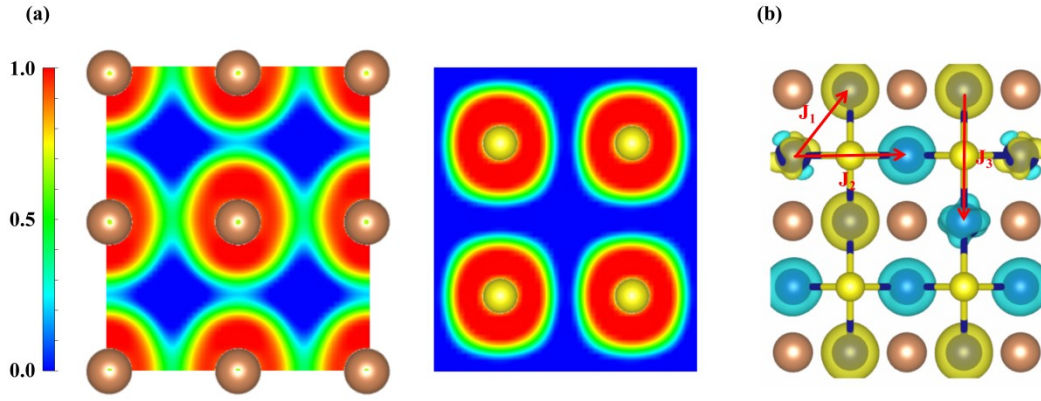

**FIG. S1.** (a) Electron localization function of the Cr<sub>2</sub>SbS monolayer. (b) Calculated spin-polarized charge density.

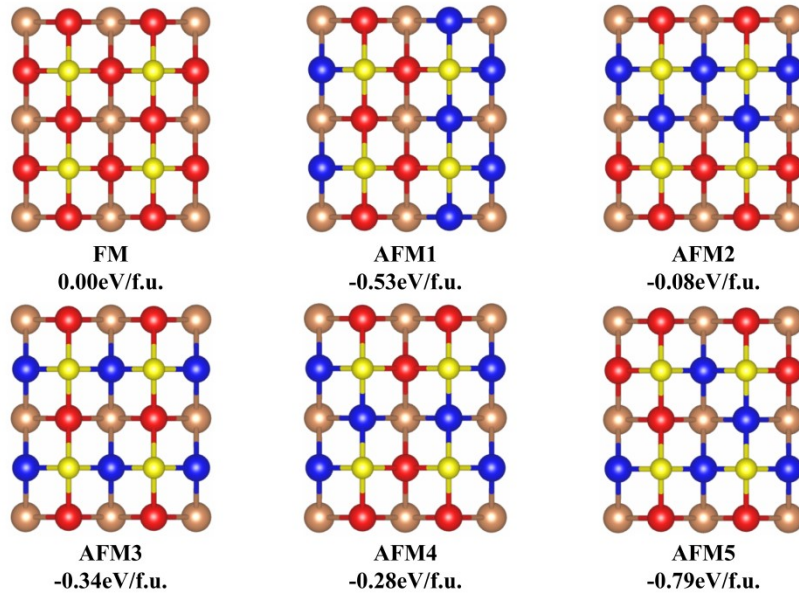

**FIG. S2.** Six magnetic configurations of the Cr<sub>2</sub>SbS monolayer, in which red and blue spheres represent spin-up and spin-down Cr atoms, respectively.

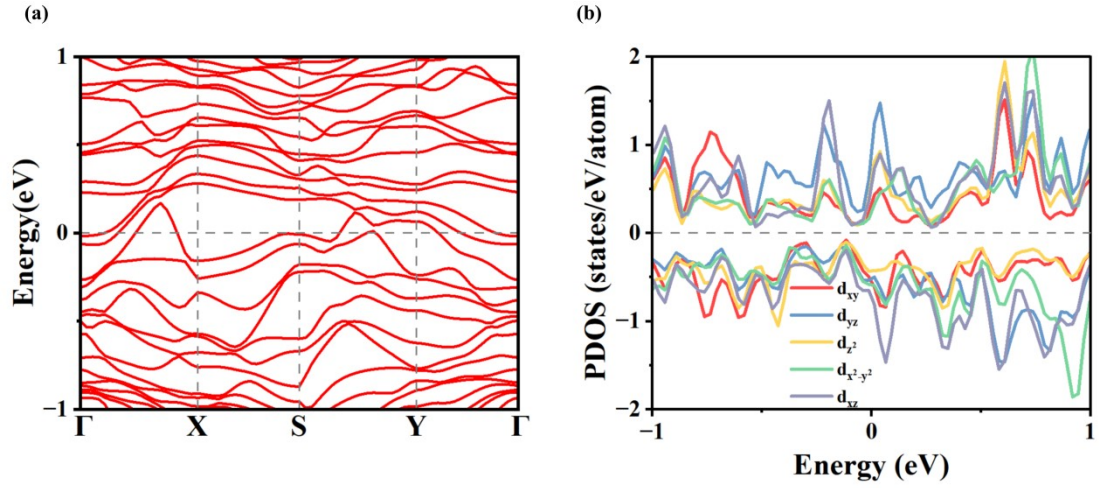

**FIG. S3.** (a) Electronic band structure with SOC included. (b) Projected density of states decomposed into the five Cr-3d orbitals.

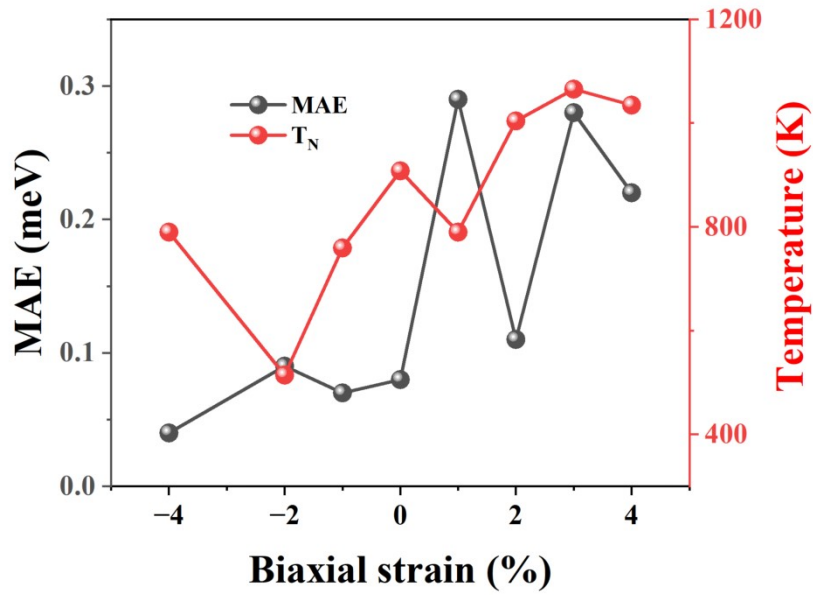

**FIG. S4.** MAE and  $T_N$  of the  $\text{Cr}_2\text{SbS}$  monolayer under biaxial strain.

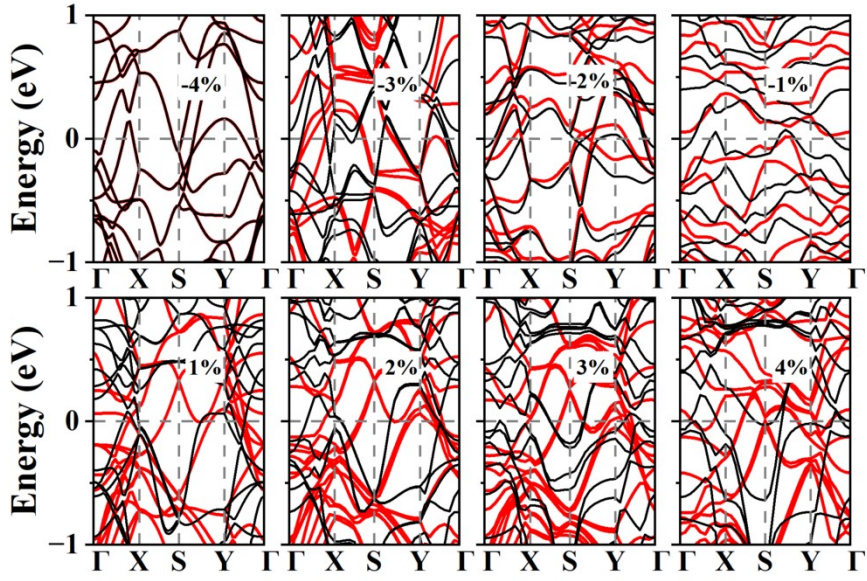

FIG. S5. Band structures of the  $\text{Cr}_2\text{SbS}$  monolayer under  $-4\%\sim 4\%$  biaxial strain.

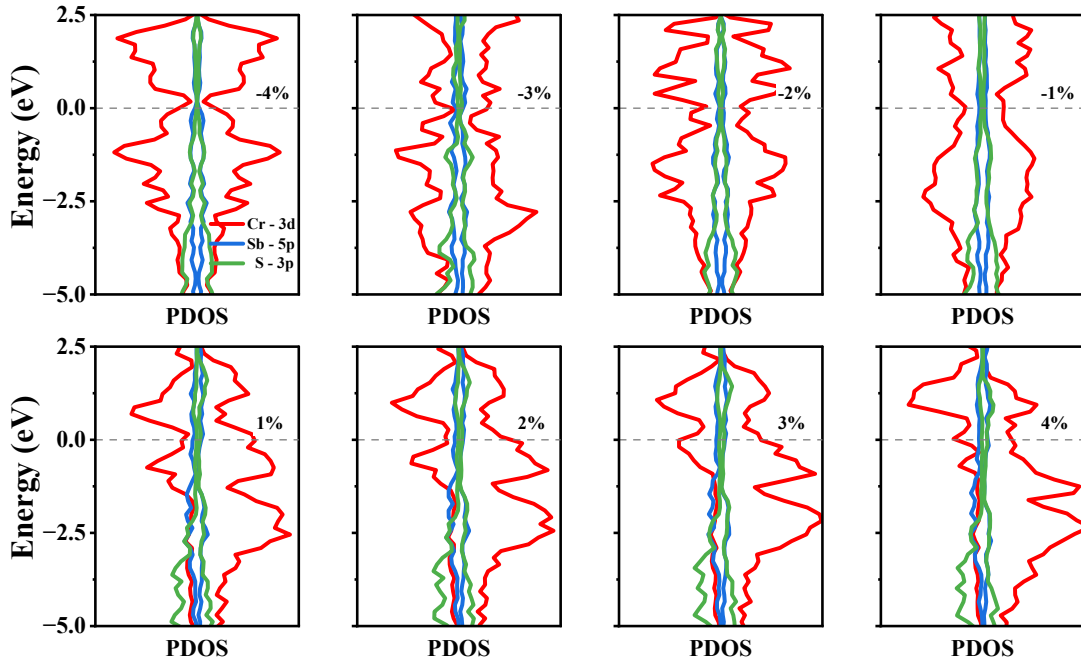

FIG. S6. PDOS of the  $\text{Cr}_2\text{SbS}$  monolayer under  $-4\%\sim 4\%$  biaxial strain.

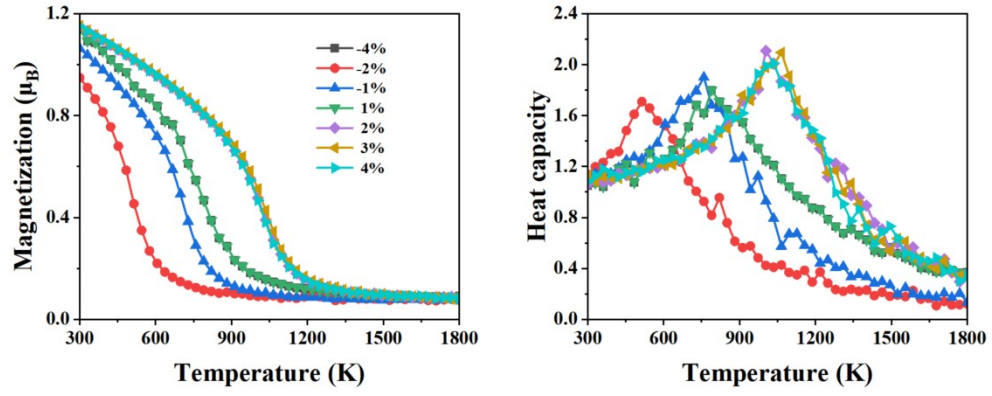

**FIG. S7.** Temperature-dependent variation of the  $M_Z$  and  $C_V$  of the  $\text{Cr}_2\text{SbS}$  monolayer under biaxial strain.
